# Supplementary material
Source: PubMed Central journal article supplement (PMC3828079)
Supplement: NIHMS526049-supplement-01.pdf [file NIHMS526049-supplement-01.pdf]

**Supplementary Figure 1.**

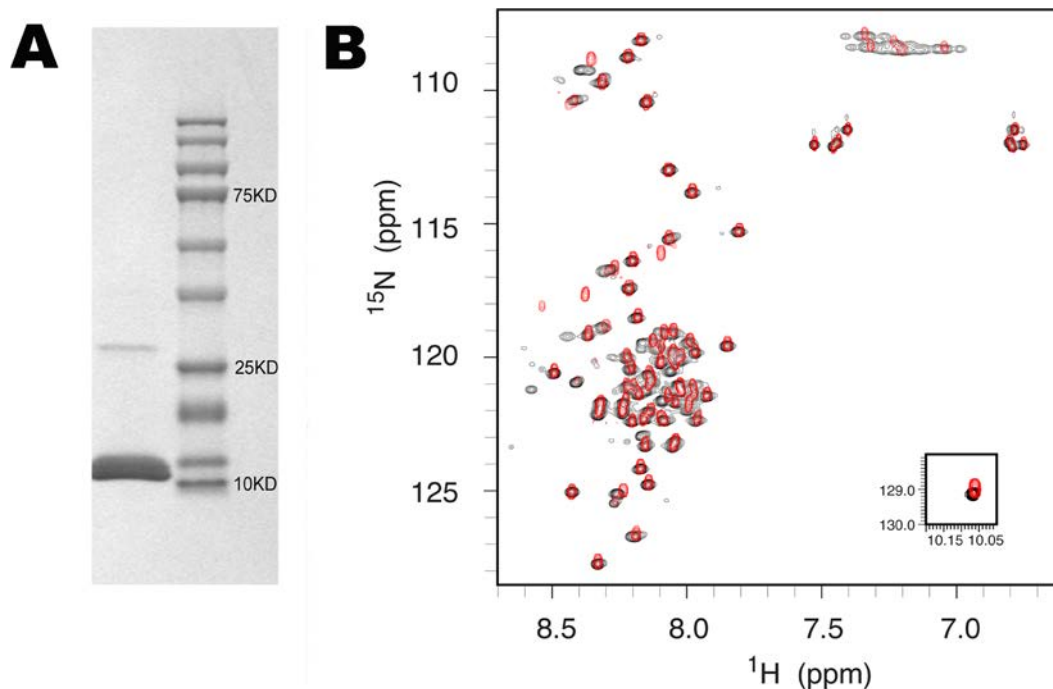

(A) Soluble His<sub>6</sub>-tagged SVIPM was purified using Ni-NTA columns. Coomassie-stained SDS-PAGE gel: Lane 1 shows the purified SVIPM proteins. Lane 2 was loaded with the molecular weight standard markers. (B) Overlay of  $^1\text{H}$ - $^{15}\text{N}$  NMR HSQC spectra that were derived from NMR experiments for wild-type SVIP (black) and SVIPM (red) in buffer-A at 25°C.

**Supplementary Table 1.** The dihedral angles of the helical regions in SVIPM were calculated by the TALOS+ software. There were two helices with 21 residues in the helix 1 and 5 residues in the helix 2. Both helices showed the typical dihedral angle of  $\alpha$ -helix. The overall helical content was consistent to that simulated by the K2D3 software based on the far-UV CD data.

| Helix Segments | Residue Number | Residue Name | Phi    | Psi   |
|----------------|----------------|--------------|--------|-------|
|                | 1              | M            | N/A    | N/A   |
|                | 2              | G            | 94.335 | 5.748 |

|         |    |   |         |         |
|---------|----|---|---------|---------|
|         | 3  | L | -85.376 | 118.197 |
|         | 4  | S | -79.325 | 131.748 |
|         | 5  | F | -95.927 | 137.279 |
|         | 6  | P | N/A     | N/A     |
|         | 7  | S | -85.532 | 134.245 |
|         | 8  | P | -58.756 | 141.127 |
|         | 9  | G | 76.698  | 5.072   |
|         | 10 | E | -79.542 | 134.915 |
|         | 11 | S | -89.906 | 134.574 |
|         | 12 | A | N/A     | N/A     |
|         | 13 | P | N/A     | N/A     |
|         | 14 | P | N/A     | N/A     |
|         | 15 | T | -81.994 | 127.526 |
|         | 16 | P | -57.467 | -28.294 |
| Helix 1 | 17 | D | -66.254 | -32.288 |
|         | 18 | L | -64.144 | -38.112 |
|         | 19 | E | -65.105 | -39.577 |
|         | 20 | E | -62.491 | -40.016 |
|         | 21 | K | -61.594 | -41.801 |
|         | 22 | R | -64.875 | -39.983 |
|         | 23 | A | -63.916 | -37.643 |
|         | 24 | K | -64.877 | -35.973 |
|         | 25 | L | -64.976 | -37.106 |
|         | 26 | A | -65.599 | -33.139 |
|         | 27 | E | -66.462 | -44.241 |
|         | 28 | A | -63.768 | -40.36  |
|         | 29 | A | -65.854 | -34.576 |
|         | 30 | E | -67.403 | -41.776 |
|         | 31 | R | -62.515 | -41.702 |
|         | 32 | R | -62.479 | -39.508 |
|         | 33 | Q | -62.516 | -40.596 |
|         | 34 | K | -61.142 | -35.814 |
|         | 35 | E | -62.398 | -42.362 |
|         | 36 | A | -63.383 | -37.302 |
|         | 37 | A | -66.531 | -33.091 |
|         | 38 | S | -75.331 | -23.476 |
|         | 39 | R | -98.936 | 0.87    |
|         | 40 | G | 87.61   | 12.964  |
|         | 41 | I | -70.623 | 139.575 |
|         | 42 | L | -86.192 | 128.701 |
|         | 43 | D | -91.903 | 140.554 |
|         | 44 | V | -70.555 | -29.651 |
|         | 45 | Q | -70.956 | -26.344 |

|         |    |   |          |         |
|---------|----|---|----------|---------|
|         | 46 | S | -63      | -37.149 |
| Helix 2 | 47 | V | -64.085  | -41.137 |
|         | 48 | Q | -64.221  | -39.224 |
|         | 49 | E | -63.607  | -39.124 |
|         | 50 | K | -73.551  | -28.603 |
|         | 51 | R | -86.13   | 143.099 |
|         | 52 | K | -92.887  | 129.979 |
|         | 53 | K | -75.134  | 135.76  |
|         | 54 | K | N/A      | N/A     |
|         | 55 | E | N/A      | N/A     |
|         | 56 | K | -87.906  | 133.631 |
|         | 57 | I | -89.401  | 130.631 |
|         | 58 | E | -82.152  | 121.141 |
|         | 59 | K | -75.769  | 120.16  |
|         | 60 | Q | -75.588  | 121.472 |
|         | 61 | I | -102.093 | 115.783 |
|         | 62 | A | -80.531  | 128.348 |
|         | 63 | T | -92.469  | 133.683 |
|         | 64 | S | -98.216  | 144.362 |
|         | 65 | G | N/A      | N/A     |
|         | 66 | P | N/A      | N/A     |
|         | 67 | P | N/A      | N/A     |
|         | 68 | P | -71.289  | 147.793 |
|         | 69 | E | -78.603  | -15.057 |
|         | 70 | G | 83.972   | 1.74    |
|         | 71 | G | -88      | 140.804 |
|         | 72 | L | -87.29   | 130.685 |
|         | 73 | R | -43.857  | 136.035 |
|         | 74 | W | -87.005  | 138.758 |
|         | 75 | T | -94.547  | 142.564 |
|         | 76 | V | -97.838  | 131.101 |
|         | 77 | S | -89.79   | 129.108 |
|         | 78 | L | -87.208  | 133.163 |
|         | 79 | E | -88.751  | -21.411 |
|         | 80 | H | N/A      | N/A     |
